# Supplementary material for: Machine learning-based predictive modeling of decline in intrinsic capacity among migrant older adults with children
Source: Research Square preprint supplement (doi:10.21203/rs.3.rs-8610961/v1), 2026-02-19
Supplement: Supplementary file 1 [file 2e4f4d41f82f331ed9cbfebd.docx]

**Appendix B.** Criteria for evaluating IC domains.

| Domains | Evaluation tool | Evaluation criteria | Score |
| --- | --- | --- | --- |
| Sensory | Self-report/Vision chart  Self-report/Whisper test | No impact on life | 1 |
| Locomotion | Short Physical Performance Battery (SPPB) | ≥10 | 1 |
| Vitality | the Mini Nutritional Assessment (MNA) | ＞24 | 1 |
| Cognition | Mini-cog | ≥ 2 | 1 |
| Psychology | 15-item Geriatric Depression Scale (GDS-15) | ＜5 | 1 |

Notes: In this study, the assessment of competence in the five domains of the IC was recoded as a dichotomous variable: 0 indicated decreased competence in each domain and 1 indicated normal functioning. The overall composite index of IC ranges from 0 to 5.
