# Supplementary material for: Machine learning-based predictive modeling of decline in intrinsic capacity among migrant older adults with children
Source: Research Square preprint supplement (doi:10.21203/rs.3.rs-8610961/v1), 2026-02-19

**Appendix A.** The health ecology model and the 23 variables included in accordance with its five dimensions.


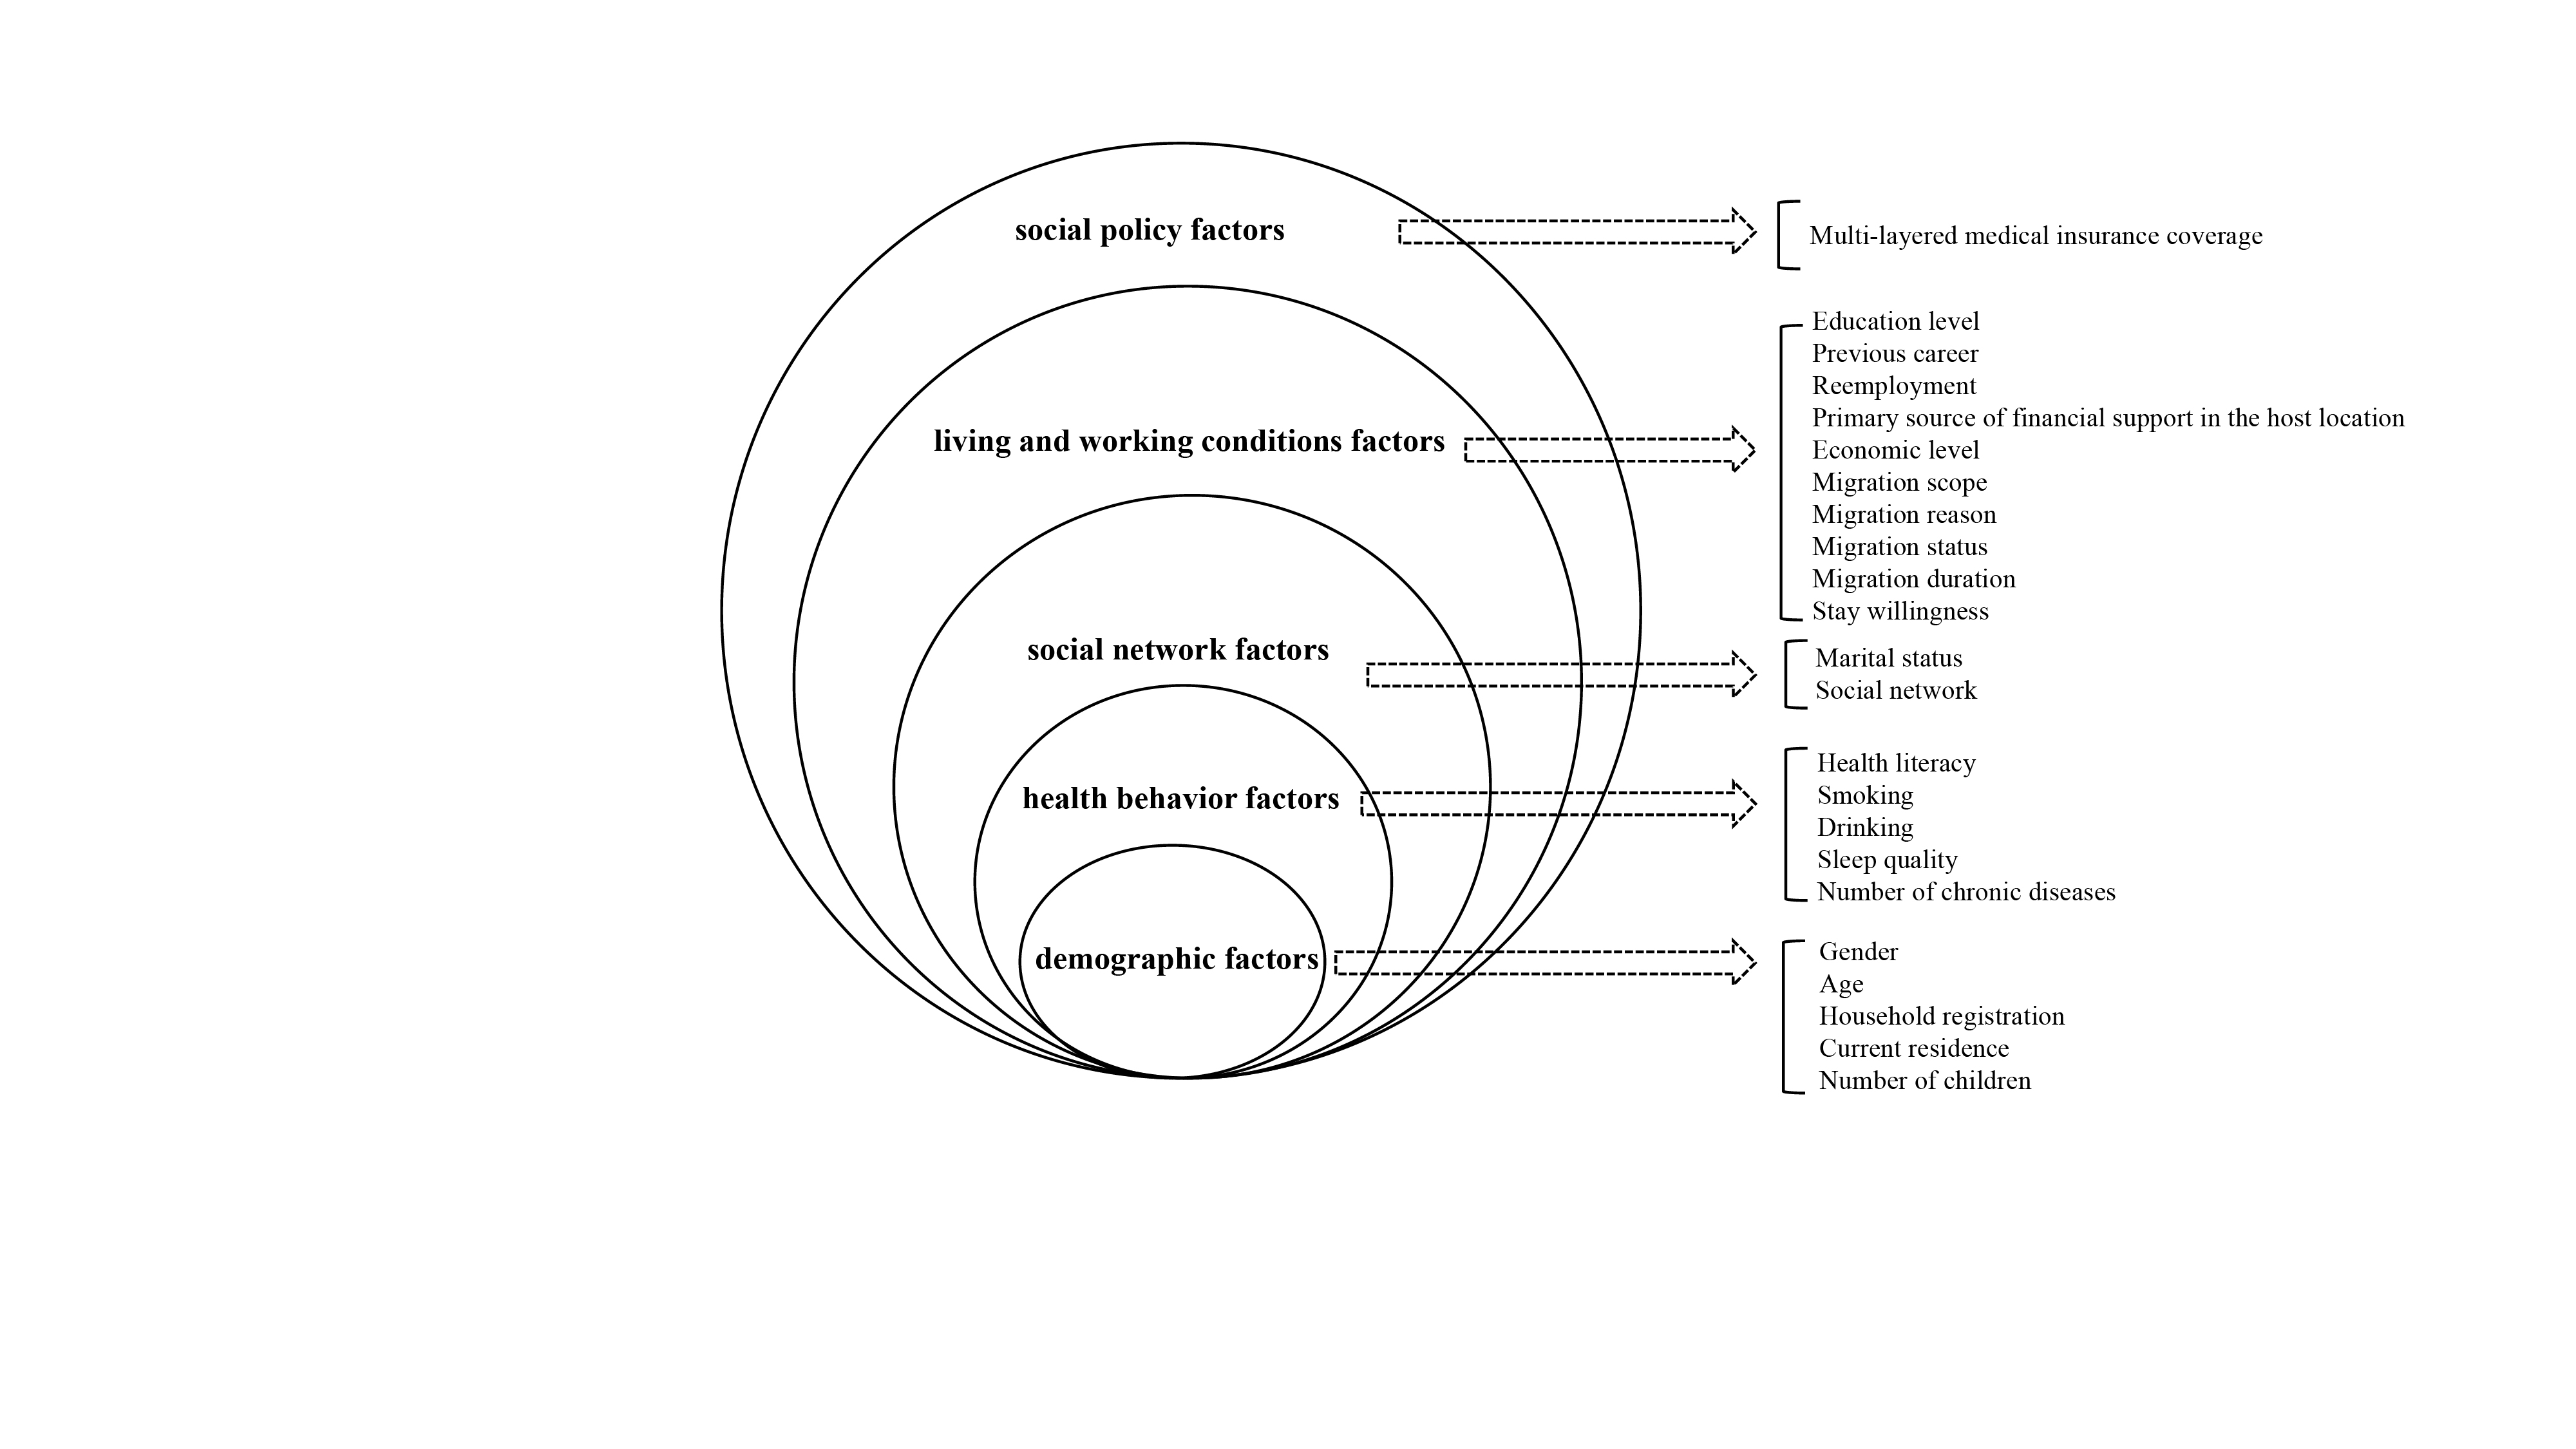

Supplement: Supplementary file 2 [file d6556477ef23fe2b043328a5.docx]
